# Supplementary material for: Highly concentrated polycations-functionalized graphenenanosheets with excellent solubility and stability, and its fast, facile and controllable assembly of multiple nanoparticles
Source: Royal Society of Chemistry journal article supplement (doi:10.1039/c2nr33395c), 2012-11-16
Supplement: c2nr33395c.pdf [file c2nr33395c.pdf]

## Electronic Supplementary Information

# Highly Concentrated Polycations-Functionalized Graphene Nanosheets with Excellent Solubility and Stability, and Its Fast , Facile and Controllable Assembly of Multiple Nanoparticles

Zhaozi Lv,<sup>†‡</sup> Xuan Yang,<sup>†‡</sup> and Erkang Wang<sup>\*,†</sup>

<sup>†</sup>State Key Laboratory of Electroanalytical Chemistry, Changchun Institute of Applied Chemistry,  
Chinese Academy of Sciences, Changchun, Jilin 130022 P. R. China.

<sup>‡</sup>University of Chinese Academy of Sciences, Beijing, 100039, P. R. China.

\* Author for Corresponding:

Prof. Dr. Erkang Wang

State Key Laboratory of Electroanalytical Chemistry

Changchun Institute of Applied Chemistry

Chinese Academy of Sciences,

Changchun, Jilin, 130022, China.

Tel: (+86) 431-85262003

Fax: (+86) 431-85689711;

Email: ekwang@ciac.jl.cn

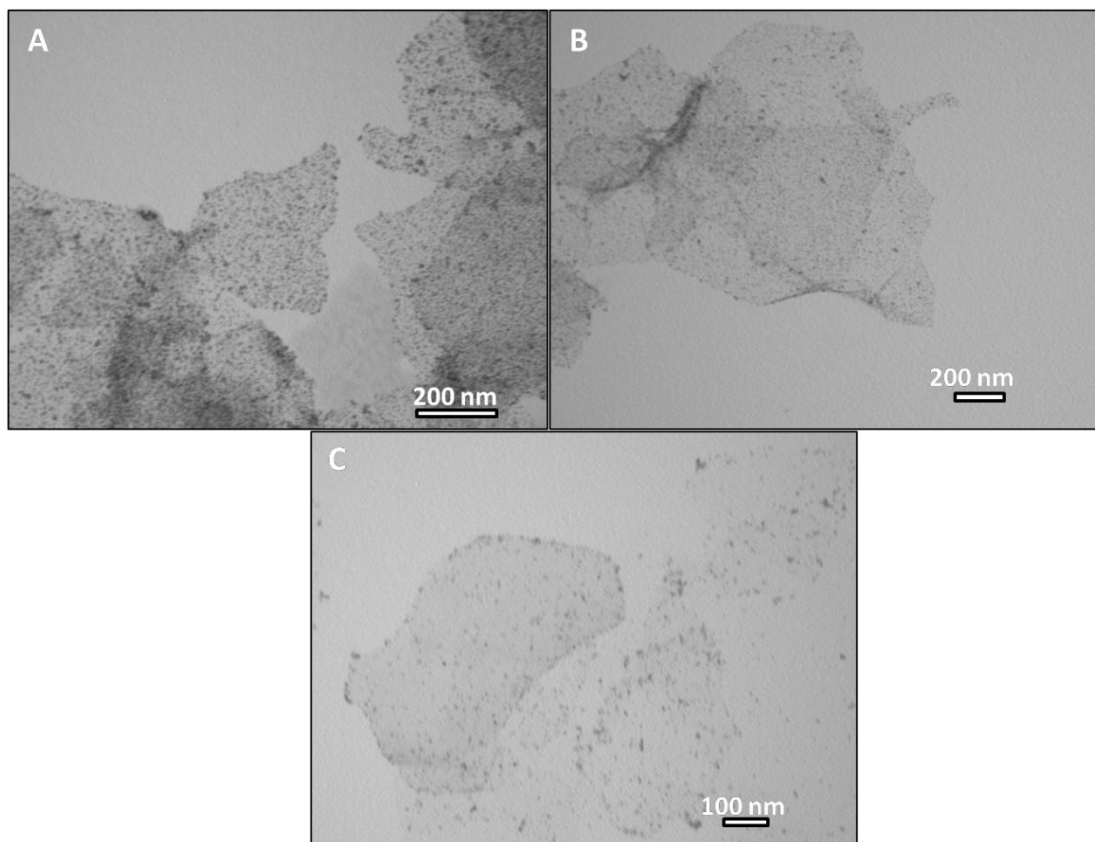

**Fig. S1** Typical TEM images of Au NP5-BGNs with well-controlled densities of AuNPs. AuNP densities were controlled by adding different volume (25  $\mu\text{L}$  (A), 75  $\mu\text{L}$  (B) and 200  $\mu\text{L}$  (C)) of 0.4  $\text{mg mL}^{-1}$  BGNs into 1 mL of citrate-capped 5 nm Au nanoparticles.
